# Supplementary material
Source: Springer Nature journal article supplement (https://www.springermedizin.de/resource/supplementary/13000_2011_499_MOESM4_ESM.pdf/9624418)

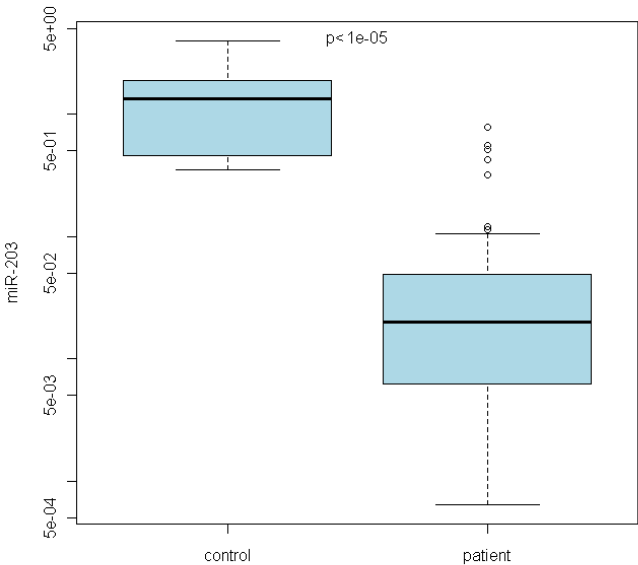

Supplement: MOESM4 [file 9624418]
